# Supplementary material for: Initial symptoms of patients with coronavirus disease 2019 in Japan: A descriptive study
Source: PubMed Central journal article supplement (PMC7849337; doi:10.1002/jgf2.378), 2020-09-26
Supplement: JGF2-22-61-s001.pdf [file JGF2-22-61-s001.pdf]

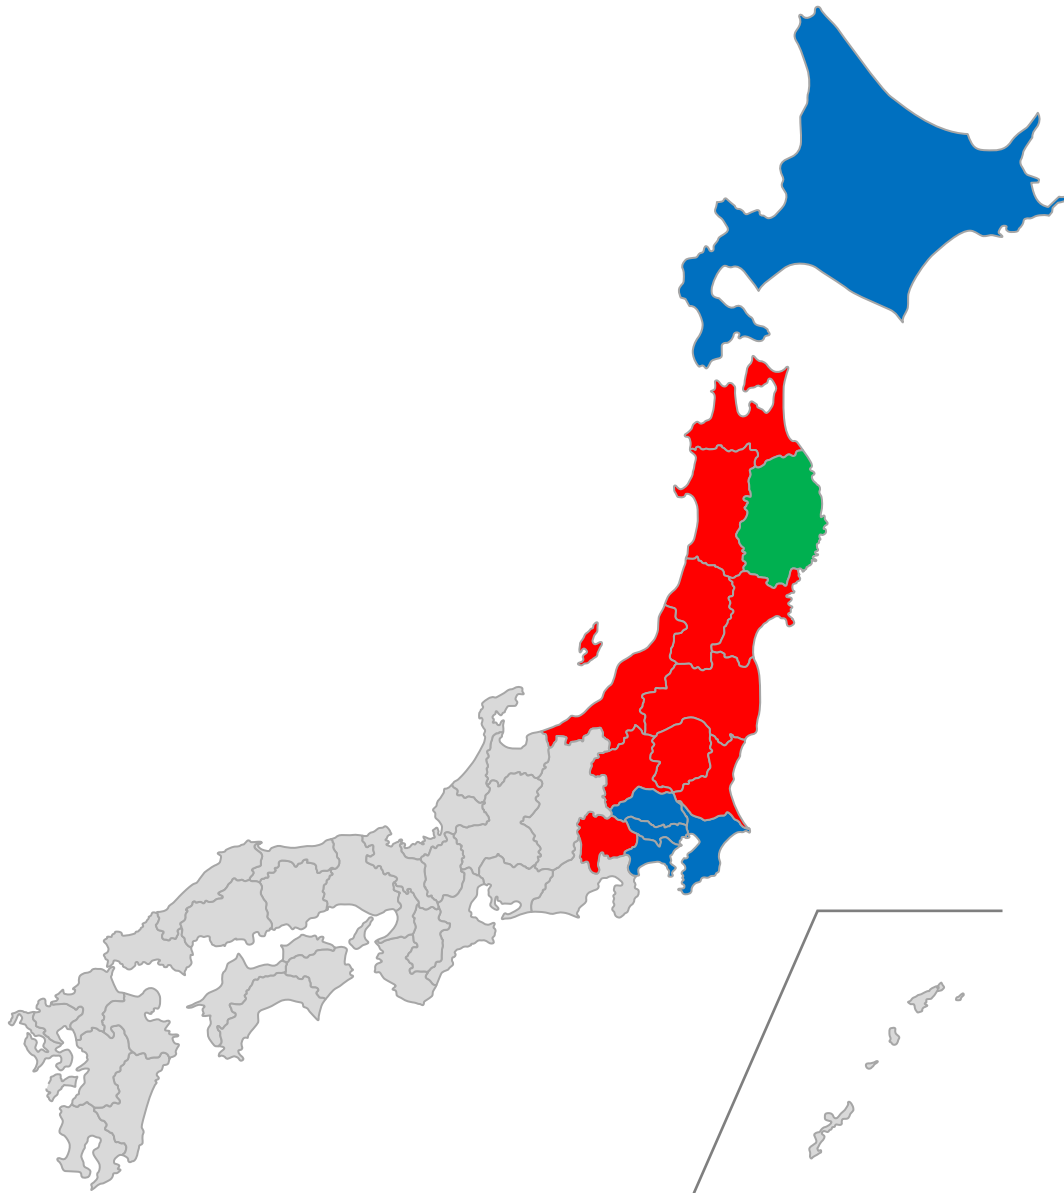

**Figure S1.** Map of Japan.

Japan consists of 47 prefectures. The prefectures in the eastern region of Japan were investigated. The ten prefectures colored in red were included in this study (Aomori, Akita, Yamagata, Miyagi, Fukushima, Niigata, Tochigi, Gunma, Ibaraki, and Yamanashi). The five prefectures colored in blue were excluded because detailed information on the initial symptoms was not publicly available for most cases. As of May 16, 2020, no COVID-19 patients were reported in Iwate prefecture (in green).

**Table S1.** Web address of the publicly available data for each prefecture.

| <b>Prefecture</b> | <b>Web address<sup>a</sup></b>                                                                                                                                                                          |
|-------------------|---------------------------------------------------------------------------------------------------------------------------------------------------------------------------------------------------------|
| Aomori            | <a href="https://www.pref.aomori.lg.jp/welfare/health/wuhan-novel-coronavirus2020.html">https://www.pref.aomori.lg.jp/welfare/health/wuhan-novel-coronavirus2020.html</a>                               |
| Akita             | <a href="https://www.pref.akita.lg.jp/pages/archive/47957">https://www.pref.akita.lg.jp/pages/archive/47957</a>                                                                                         |
| Yamagata          | <a href="https://www.pref.yamagata.jp/kenfuku/kenko/kansen/720130425shingata_corona.html">https://www.pref.yamagata.jp/kenfuku/kenko/kansen/720130425shingata_corona.html</a>                           |
| Miyagi            | <a href="https://www.pref.miyagi.jp/site/covid-19/02.html">https://www.pref.miyagi.jp/site/covid-19/02.html</a>                                                                                         |
| Fukushima         | <a href="https://www.pref.fukushima.lg.jp/sec/21045c/fukushima-hasseyoukyou.html">https://www.pref.fukushima.lg.jp/sec/21045c/fukushima-hasseyoukyou.html</a>                                           |
| Niigata           | <a href="https://www.pref.niigata.lg.jp/site/shingata-corona/256362836.html">https://www.pref.niigata.lg.jp/site/shingata-corona/256362836.html</a>                                                     |
| Gunma             | <a href="https://www.pref.gunma.jp/07/z87g_00016.html">https://www.pref.gunma.jp/07/z87g_00016.html</a>                                                                                                 |
| Tochigi           | <a href="http://www.pref.tochigi.lg.jp/e04/welfare/hoken-eisei/kansen/hp/coronakensahasseyoukyou.html">http://www.pref.tochigi.lg.jp/e04/welfare/hoken-eisei/kansen/hp/coronakensahasseyoukyou.html</a> |
| Ibaraki           | <a href="https://www.pref.ibaraki.jp/1saigai/2019-ncov/hassei.html">https://www.pref.ibaraki.jp/1saigai/2019-ncov/hassei.html</a>                                                                       |
| Yamanashi         | <a href="https://www.pref.yamanashi.jp/koucho/coronavirus/info_coronavirus_prevention.html">https://www.pref.yamanashi.jp/koucho/coronavirus/info_coronavirus_prevention.html</a>                       |

<sup>a</sup>Last accessed on 31 July, 2020.

**Table S2.** The number of the COVID-19 patients included in the study from each prefecture.

| <b>Prefecture</b> | <b>Total number of patients</b> | <b>The number of excluded patients<sup>a</sup></b> | <b>The number of included patients</b> |
|-------------------|---------------------------------|----------------------------------------------------|----------------------------------------|
| Aomori            | 27                              | 5                                                  | 22                                     |
| Akita             | 16                              | 0                                                  | 16                                     |
| Yamagata          | 69                              | 1                                                  | 68                                     |
| Miyagi            | 88                              | 3                                                  | 85                                     |
| Fukushima         | 81                              | 2                                                  | 79                                     |
| Niigata           | 82                              | 2                                                  | 79                                     |
| Gunma             | 147                             | 68                                                 | 79                                     |
| Tochigi           | 60                              | 0                                                  | 60                                     |
| Ibaraki           | 168                             | 6                                                  | 162                                    |
| Yamanashi         | 57                              | 0                                                  | 57                                     |

<sup>a</sup>These patients were excluded because detailed information on the initial symptoms was not available in the reports from the prefectures.

**Table S3.** Demographic features of the symptomatic and asymptomatic COVID-19 patients.

|                                           | Asymptomatic (n = 79) | Symptomatic (n = 628) |
|-------------------------------------------|-----------------------|-----------------------|
| Age, n (%)                                |                       |                       |
| 0 to 19 years old                         | 12 (15.2)             | 33 (5.3)              |
| 20 to 59 years old                        | 42 (53.2)             | 424 (67.5)            |
| 60 years old and older                    | 25 (31.6)             | 171 (27.2)            |
| Female sex, n (%)                         | 53 (67.1)             | 291 (46.3)            |
| Median days to diagnosis from onset (IQR) | NA                    | 6 (4 to 9)            |

COVID-19, coronavirus disease 2019; IQR, interquartile range; NA, not applicable.
